# Supplementary material
Source: publisher figshare collection journal article supplement (https://acs.figshare.com/ndownloader/files/5092540)
Supplement: Supplementary file 1 [file 5092540]

## **Supporting Information**

# **Mixture Toxicity of Reactive Chemicals by Using Two Bacterial Growth Assays as Indicators of Protein and DNA Damage**

8 pages, three figures and two tables

Manuela Richter

Beate I. Escher \*

Department of Environmental Toxicology,

Swiss Federal Institute for Aquatic Sciences and Technology (Eawag),

CH-8600 Dübendorf, Switzerland

\*Corresponding author; e-mail address: [escher@eawag.ch](mailto:escher@eawag.ch),

Tel. 0041-44-823 5068, Fax 0041-44-823 5471

## Working Hypotheses

The working hypotheses for the present study are presented in a flow chart for better orientation (Figure S-1).

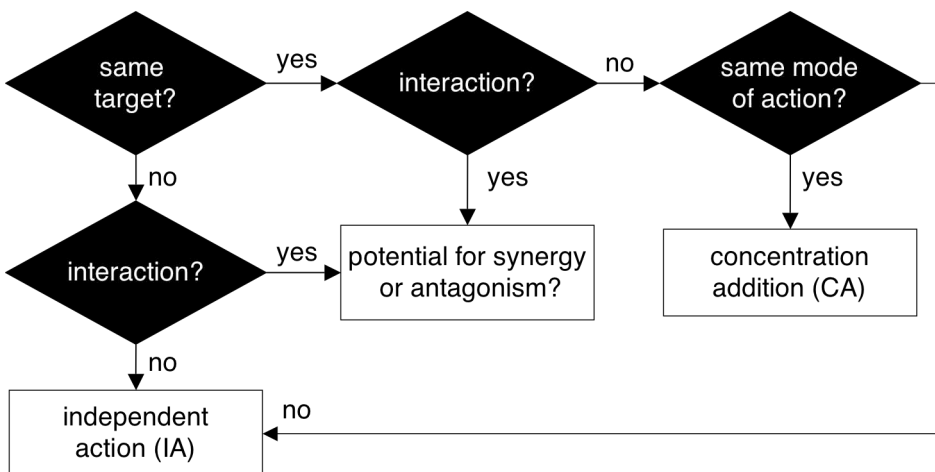

**Figure S-1. Working hypotheses.**

## Additional Information on the reference chemical CTP

4-Chlorothiophenol (CTP) was used as model compound for a nucleophilic molecule. CTP has an acidity constant of 6.13 (1). Its thiol group is therefore deprotonated at ambient pH and the negatively charged sulfide is highly nucleophilic (just like the cysteine groups in proteins and peptides). Substituted thiophenols have been shown to be highly cytotoxic (1). They inhibited the proliferation of rapidly growing mouse leukemia cells *in vitro* and this effect could be related to electronic parameters in a QSAR (1). The high activity of CTP in the cell proliferation test was attributed to the formation of sulfur-centered radicals, which induce oxidative stress (1). The  $EC_{50}$  in the GSH+ strain was 0.033 mM (Table 1), i.e. it is among the more toxic chemicals in the test set, but it is also more hydrophobic with an octanol-water partition coefficient  $\log K_{ow}$  of 3.39 (1). When comparing the  $EC_{50}$  value with that of baseline toxicants in this test set (2), a preliminary QSAR analysis indicated an excess of baseline toxicity (Figure S-2).

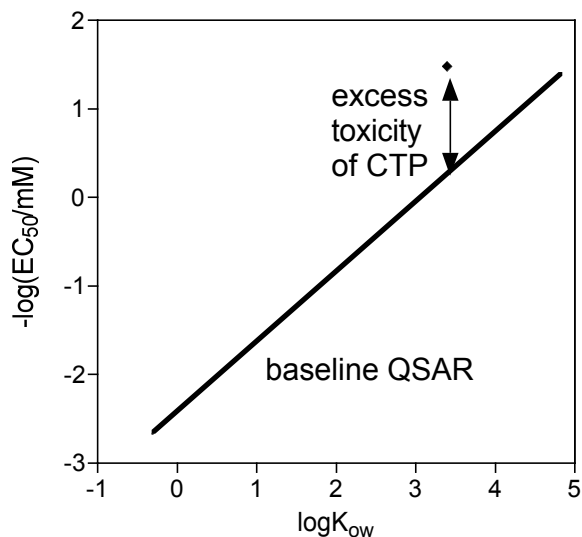

**Figure S-2. QSAR analysis indicative of excess toxicity of CTP.**

## Two-Stage Predictions

In two-stage predictions (TSP) groups of similarly acting compounds were described with CA and the predictions of these groups were fed in models for IA using the different CA-groups as one component each in modeling the IA prediction. This method was successfully applied to predict the toxicity of a 40-component mixture of herbicides with four different modes of action in algae (3) and helped to explain mixture effects of a complex mixture of pollutants in contaminated sediments (4).

The TSP approach can also be exploited as a diagnostic tool for mode of action analysis. In a group of 14 nitrobenzenes, Altenburger et al. (5) identified three compounds that apparently did not act through the same mode of toxic action as the other nitrobenzenes (baseline toxicity) by comparing different TSP with experimental mixture effects.

A similar approach was used for the identification of the specific mode of toxic action of the  $\beta$ -blocker propranolol in algae (2). QSAR (quantitative structure-activity relationship) analysis revealed a specific effect of propranolol in green algae. The following exploration of TSP of mixtures of baseline toxicants, specific inhibitors of photosystem II and propranolol clearly showed that propranolol exhibits another yet unidentified mode of toxic action because it was modeled best with a TSP using all baseline toxicants as one CA group and combining these with propranolol and the inhibitor of photosystem II through the model of IA.

Particularly in mixtures with a low number of components and in biotests with high inherent variability it is often not possible to resolve the different predictions of CA and IA sufficiently to distinguish quantitatively between them (6). Thus such approaches are valuable diagnostic tools only if predictions can be quantitatively discriminated.

For the mixtures of similarly and dissimilarly acting compounds in the test for glutathione-depletion related toxicity we mentioned in the MS, that a TSP might be the appropriate model. The TSP lay between the predictions for CA and IA (Figure S-3) and did not describe better the experimental data. Considering the variability of the experimental data and the small differences in the predictions, the hypothesis of predictability by TSP cannot be refuted, though. In case of mixtures of nonspecifically acting chemicals, a TSP is not reasonable because all mixture components act via the same two toxic mechanisms.

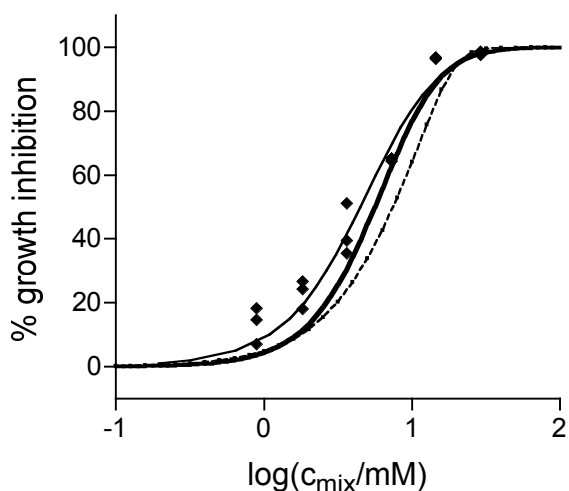

**Figure S-3.** Two-stage prediction of mixture toxicity for the test with GSH+ (*E.coli* strain MJF 276) and the mixture of 3 acrylates and 3 epoxides (0.02% ACR, 5.2% ACN, 2.2%EA, 78.8% EOX, 5.3% EPOX, 8.5% SOX). The solid line is the prediction for CA, the broken line the prediction for IA and the bold line the TSP.

### Additional Information

Statistical information complementing Tables 1 and 2 is given in Tables S-1 and S-2.

| Compound | <i>E. coli</i><br>strain | EC <sub>50</sub> (mM) | 95% confidence<br>interval of EC <sub>50</sub> (mM) | slope | 95% confidence<br>interval of slope | Number of data<br>points | r <sup>2</sup> |
|----------|--------------------------|-----------------------|-----------------------------------------------------|-------|-------------------------------------|--------------------------|----------------|
| ACR      | GSH+                     | 0.01                  | 0.008 to 0.011                                      | 2.19  | 1.19 to 3.19                        | 31                       | 0.880          |
| ACA      | GSH+                     | 30.67                 | 28.04 to 33.55                                      | 1.41  | 1.22 to 1.61                        | 38                       | 0.969          |
| ACN      | GSH+                     | 1.88                  | 1.79 to 1.98                                        | 1.42  | 1.30 to 1.53                        | 40                       | 0.999          |
| EA       | GSH+                     | 0.72                  | 0.66 to 0.78                                        | 1.44  | 1.23 to 1.65                        | 44                       | 0.965          |
| HEA      | GSH+                     | 0.66                  | 0.62 to 0.70                                        | 1.47  | 1.33 to 1.61                        | 43                       | 0.981          |
| IBA      | GSH-                     | 0.82                  | 0.66 to 1.0                                         | 0.97  | 0.76 to 1.18                        | 26                       | 0.925          |
| EPOX     | GSH+                     | 1.01                  | 0.95 to 1.07                                        | 4.30  | 2.79 to 5.80                        | 37                       | 0.941          |
| SOX      | GSH+                     | 1.57                  | 1.44 to 1.72                                        | 1.23  | 1.07 to 1.39                        | 37                       | 0.967          |
| EOX      | GSH+                     | 19.11                 | 16.61 to 21.99                                      | 1.43  | 1.10 to 1.77                        | 37                       | 0.908          |
| EPI      | GSH+                     | 4.37                  | 4.22 to 4.54                                        | 1.96  | 1.78 to 2.14                        | 34                       | 0.995          |
| BCI      | GSH+                     | 0.41                  | 0.37 to 0.46                                        | 1.30  | 1.04 to 1.56                        | 37                       | 0.966          |
| DCIP     | GSH+                     | 0.06                  | 0.05 to 0.06                                        | 1.96  | 1.40 to 2.52                        | 31                       | 0.949          |
| DCIB     | GSH-                     | 0.09                  | 0.08 to 0.09                                        | 2.81  | 2.07 to 3.55                        | 31                       | 0.966          |
| NBCI     | GSH+                     | 0.08                  | 0.07 to 0.09                                        | 1.69  | 1.30 to 2.08                        | 35                       | 0.961          |
| MBCI     | GSH+                     | 0.69                  | 0.61 to 0.77                                        | 2.22  | 1.49 to 2.94                        | 56                       | 0.891          |
| CTP      | GSH+                     | 0.03                  | 0.030 to 0.037                                      | 1.37  | 1.19 to 1.55                        | 48                       | 0.933          |

|      |      |       |                  |      |               |    |       |
|------|------|-------|------------------|------|---------------|----|-------|
| ACR  | GSH- | 0.003 | 0.0025 to 0.0030 | 2.35 | 1.79 to 2.91  | 67 | 0.904 |
| ACN  | GSH- | 0.88  | 0.83 to 0.93     | 1.38 | 1.23 to 1.54  | 54 | 0.976 |
| EA   | GSH- | 0.37  | 0.35 to 0.40     | 1.32 | 1.13 to 1.50  | 50 | 0.962 |
| EPOX | GSH- | 1.16  | 0.94 to 1.4      | 1.33 | 0.823 to 1.83 | 52 | 0.733 |
| SOX  | GSH- | 1.38  | 1.26 to 1.52     | 1.25 | 1.05 to 1.45  | 34 | 0.957 |
| EOX  | GSH- | 15.24 | 14.10 to 16.47   | 1.58 | 1.32 to 1.84  | 29 | 0.963 |
| ACN  | DNA+ | 5.36  | 3.61 to 7.96     | 1.34 | 0.63 to 2.06  | 14 | 0.764 |
| HEA  | DNA+ | 1.26  | 0.46 to 3.40     | 0.82 | 0.21 to 1.43  | 10 | 0.628 |
| SOX  | DNA+ | 0.03  | 0.015 to 0.064   | 0.93 | 0.267 to 1.59 | 12 | 0.662 |
| EOX  | DNA+ | 2.41  | 1.46 to 3.96     | 2.11 | 0.129 to 4.08 | 12 | 0.796 |
| ACN  | DNA- | 14.84 | 7.20 to 30.59    | 0.31 | 0.12 to 0.49  | 18 | 0.443 |
| HEA  | DNA- | 7.75  | 5.671 to 10.60   | 0.71 | 0.49 to 0.93  | 17 | 0.827 |
| SOX  | DNA- | 6.48  | 5.877 to 7.141   | 2.24 | 1.55 to 2.92  | 47 | 0.846 |
| EOX  | DNA- | 137.3 | 89.52 to 210.5   | 1.66 | 0.57 to 2.70  | 12 | 0.803 |

**Table S-1. Descriptors and statistics of the concentration-effect curves of the single compounds (extension of Table 1 in the manuscript)**

| Mixture composition<br>p <sub>i</sub> (mol%)                                                       | <i>E. coli</i><br>strain | EC <sub>50</sub> (mM) | 95% confidence<br>interval of EC <sub>50</sub><br>(mM) | slope | 95% confidence<br>interval of slope | Degrees<br>of<br>freedom | r <sup>2</sup> |
|----------------------------------------------------------------------------------------------------|--------------------------|-----------------------|--------------------------------------------------------|-------|-------------------------------------|--------------------------|----------------|
| 0.4% ACR, 68% ACN, 31.6%EA                                                                         | GSH+                     | 1.03                  | 0.93 to 1.14                                           | 1.98  | 1.63 to 2.34                        | 16                       | 0.978          |
| 0.4% ACR, 68% ACN, 31.6%EA                                                                         | GSH-                     | 0.26                  | 0.23 to 0.29                                           | 1.68  | 1.31 to 2.04                        | 22                       | 0.932          |
| 0.02% ACR, 5.2% ACN, 2.2%EA,<br>78.8% EOX, 5.3% EPOX, 8.5%<br>SOX                                  | GSH+                     | 4.16                  | 3.65 to 4.75                                           | 1.58  | 1.28 to 1.89                        | 16                       | 0.965          |
| 0.02% ACR, 5.2% ACN, 2.2%EA,<br>78.8% EOX, 5.3% EPOX, 8.5%<br>SOX                                  | GSH-                     | 2.45                  | 2.21 to 2.72                                           | 1.27  | 1.10 to 1.44                        | 28                       | 0.958          |
| 91% EOX, 3% EPOX, 6% SOX                                                                           | GSH+                     | 9.28                  | 8.76 to 9.83                                           | 1.81  | 1.63 to 1.98                        | 28                       | 0.986          |
| 91% EOX, 3% EPOX, 6% SOX                                                                           | GSH-                     | 8.81                  | 7.76 to 10.0                                           | 1.90  | 1.48 to 2.32                        | 16                       | 0.963          |
| 0.01% ACR, 1.3%ACA, 23.1%<br>ACN, 3.1% EA, 1.1%HEA, 0.7%<br>IBA, 64.8% EOX, 4.6% EPOX,<br>1.3% SOX | GSH+                     | 2.99                  | 2.85-3.14                                              | 1.89  | 1.72 to 2.06                        | 34                       | 0.984          |
| 80.3% EPI, 6.3% BCI, 1.0% DCIP,<br>1.5% DCIB, 1.4% NBCI, 9.6% MBCI                                 | GSH+                     | 1.41                  | 1.32 to 1.51                                           | 1.90  | 1.67 to 2.12                        | 28                       | 0.982          |

**Table S-2. Descriptors and statistics of the concentration-effect curves of the mixtures (extension of Table 2 in the manuscript)**

## Additional References

- (1) Verma, R. P.; Kapur, S.; Barberena, O.; Shusterman, A.; Hansch, C. H.; Selassie, C. D. Synthesis, cytotoxicity and QSAR analysis of X-thiophenols in rapidly dividing cells. *Chem. Res. Toxicol.* **2003**, *16*, 276-284.
- (2) Escher, B. I.; Bramaz, N.; Eggen, R. I. L.; Richter, M. In-vitro Assessment of Modes of Toxic Action of Pharmaceuticals in Aquatic Life. *Environ. Sci. Technol.* **2005**, *39*, 3090-3100.
- (3) Junghans, M. *Studies on combination effects of environmentally relevant toxicants: Validation of prognostic concepts for assessing the algal toxicity of realistic aquatic pesticide mixtures*, Ph D. Thesis, University of Bremen, Germany, <http://elib.suub.uni-bremen.de>, 2004.
- (4) Altenburger, R.; Walter, H.; Grote, M. What contributes to the combined effect of a complex mixture? *Environ. Sci. Technol.* **2004**, *38*, 6353-6362.
- (5) Altenburger, R.; Schmitt, H.; Schüürmann, G. Algal toxicity of nitrobenzenes: Combined effect analysis as a pharmacological probe for similar modes of interaction. *Environ. Toxicol. Chem.* **2005**, *24*, 324-333.
- (6) Faust, M. *Kombinationseffekte von Schadstoffen auf aquatische Organismen: Prüfung der Vorhersagbarkeit am Beispiel einzelliger Grünalgen (Combination effects of pollutants on aquatic organisms: Assessment of predictability on the example of unicellular green algae)*, Ph D. Thesis, University of Bremen, Germany, 1999.
